# Supplementary material for: Challenges in Stratifying the Molecular Variability of Patient-Derived Colon Tumor Xenografts
Source: Hindawi journal article supplement (doi:10.1155/2018/2954208), 2018-12-19

## Supplementary figures to manuscript:

### Challenges in stratifying the molecular variability of patient-derived colon tumor xenografts

Magdalena Cybulska<sup>1,2#</sup>, Tomasz Olesinski<sup>3#</sup>, Krzysztof Goryca<sup>1</sup>, Katarzyna Paczkowska<sup>1</sup>, Malgorzata Statkiewicz<sup>1</sup>, Michal Kopczynski<sup>1</sup>, Aleksandra Grochowska<sup>1,2</sup>, Katarzyna Unrug-Bielawska<sup>1</sup>, Anita Tyl-Bielicka<sup>1</sup>, Marta Gajewska<sup>1</sup>, Andrzej Mroz<sup>3</sup>, Michalina Dabrowska<sup>1</sup>, Jakub Karczmarski<sup>1</sup>, Agnieszka Paziewska<sup>2</sup>, Leszek Zajac<sup>3</sup>, Mariusz Bednarczyk<sup>3</sup>, Michal Mikula<sup>1\*</sup>, Jerzy Ostrowski<sup>1,2,\*</sup>

<sup>1</sup> Department of Genetics, Maria Sklodowska-Curie Institute – Oncology Centre; 02-781 Warsaw, Poland

<sup>2</sup> Department of Gastroenterology, Hepatology and Clinical Oncology, Medical Center for Postgraduate Education; 01-813 Warsaw, Poland

<sup>3</sup> Department of Gastroenterological Oncology, Maria Sklodowska-Curie Institute – Oncology Centre; 02-781 Warsaw, Poland

# Equal contribution

\*Corresponding Author:

Jerzy Ostrowski, MD, PhD; Maria Sklodowska-Curie Institute – Oncology Centre, Roentgena 5, 02-781 Warsaw, Poland, Tel: +48 225462575, Fax: +48 225462449, E-mail: [jostrow@warman.com.pl](mailto:jostrow@warman.com.pl)

Michal Mikula, PhD; Maria Sklodowska-Curie Institute – Oncology Centre, Roentgena 5, 02-781 Warsaw, Poland, Tel: +48 225462655, Fax: +48 225462449, E-mail: [mikula.michal@coi.pl](mailto:mikula.michal@coi.pl)

**Figure S1.** Immunohistochemistry of HLA confirms loss of the human component in PDX tissue stroma (10x objective).

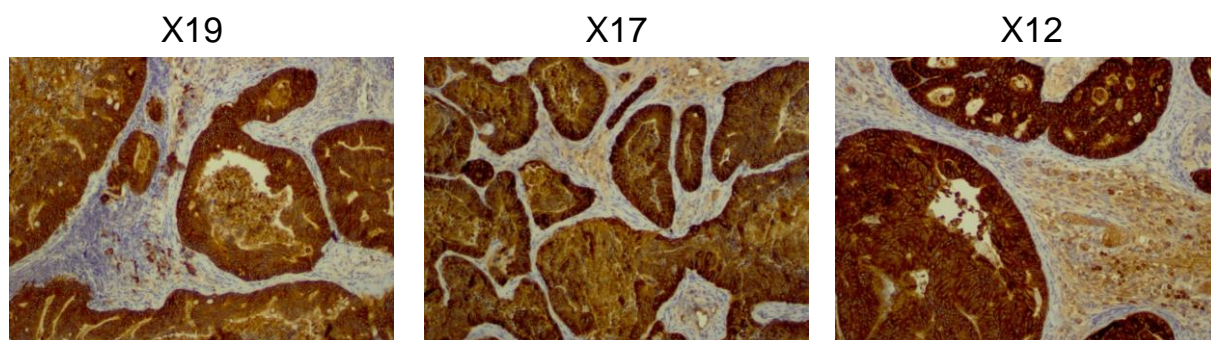

**Figure S2.** Fraction of reads supporting deleterious variants in *TP53* in primary tissue (red columns) and PDXs (green columns). No deleterious variants were found in cell lines. Fields with values larger than 0.66 are marked red. REF - reference variant, ALT - alternative variant.

| Genomic position | REF | ALT | X105 | X105p2 | X19  | X19P2 | X20  | x20p2 | X28  | X28P2 | X34 | X34P2 | x35 | x35p2 | X37 | X37P2 | x39  | x39p2 | x41 | X41P2 | x49  | X49P2 |
|------------------|-----|-----|------|--------|------|-------|------|-------|------|-------|-----|-------|-----|-------|-----|-------|------|-------|-----|-------|------|-------|
| 7577538          | C   | T   |      |        |      |       |      |       |      |       |     |       |     |       |     |       |      |       |     |       | 0.13 | 1     |
| 7577547          | C   | T   |      |        |      |       |      |       |      |       |     |       |     |       |     |       |      |       |     | 1     |      |       |
| 7577570          | C   | A   |      |        |      |       |      |       |      | 0.49  | 1   |       |     |       |     |       |      |       |     |       |      |       |
| 7578265          | A   | G   | 0.21 |        |      |       |      |       |      |       |     |       |     |       |     |       |      |       |     |       |      |       |
| 7578281          | G   | T   |      |        | 0.56 | 0.99  |      |       |      |       |     |       |     |       |     |       |      |       |     |       |      |       |
| 7578404          | A   | G   |      |        |      |       | 0.43 | 1     |      |       |     |       |     |       |     |       |      |       |     |       |      |       |
|                  |     |     | X52  | X52p2  | X53  | X53p2 | X58  | X58p2 | X87  | X87p2 | X95 | X95p2 | X97 | X97p2 | X12 | X12P2 | X17  | X17p2 | X29 | X29P2 | X2   | X2P2  |
| 7576896          | T   | TG  |      |        |      |       |      |       |      |       |     |       |     |       |     |       | 0.47 | 0.97  |     |       |      |       |
| 7577094          | G   | A   |      |        |      |       | 0.6  | 1     |      |       |     |       |     |       |     |       |      |       |     |       |      |       |
| 7577570          | C   | T   |      |        |      |       |      |       |      |       |     |       |     |       | 1   |       |      |       |     |       |      |       |
| 7578406          | C   | T   |      |        | 0.68 | 0.99  |      |       | 0.42 | 1     |     |       |     |       |     |       |      |       |     | 0.12  | 1    |       |

Figure S3. Waterfall plot of the most frequently mutated cancer driver genes.

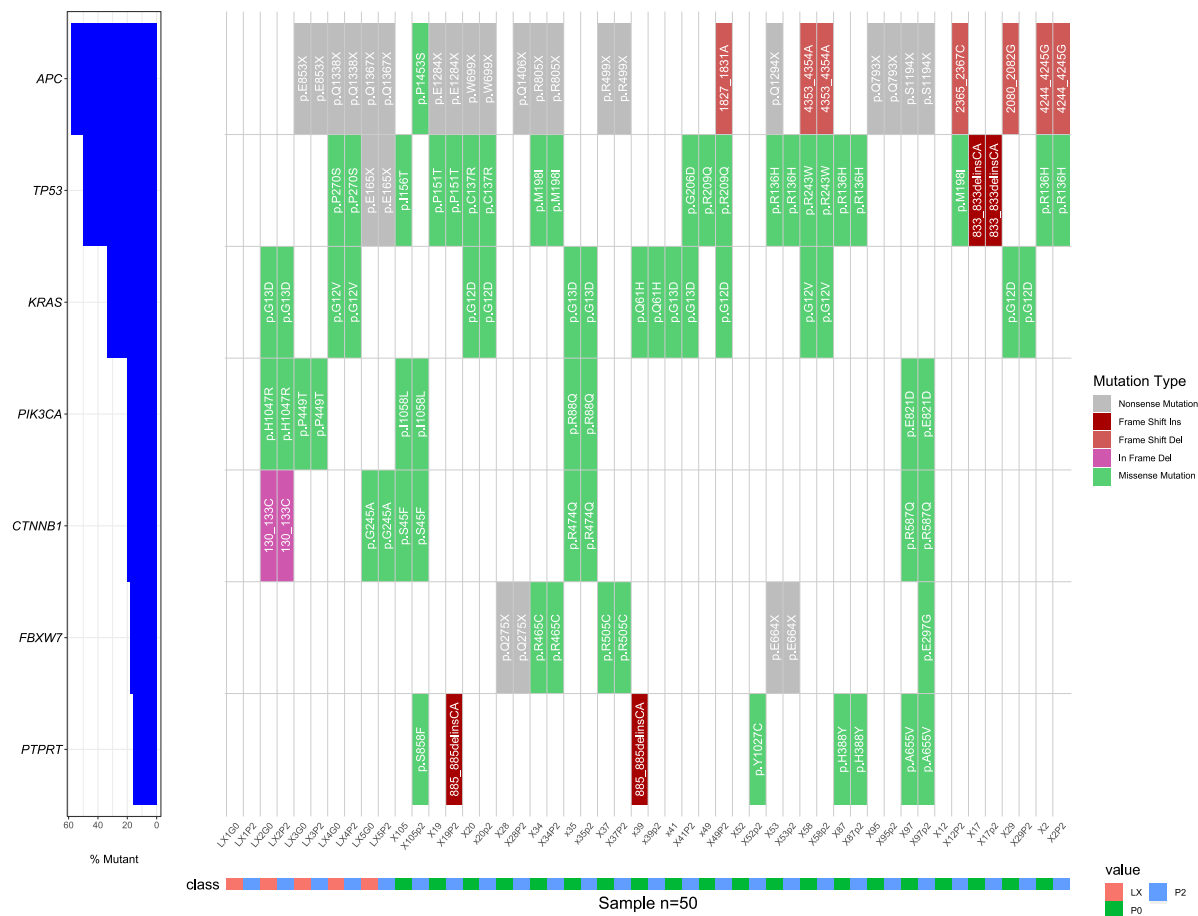

**Figure S4.** Number of single nucleotide variants and short indels identified in each sample. Samples LX2 and X97 had more than 100 and 400 variants/MB, respectively, and don't fit the scale (see the first panel in Figure 3).

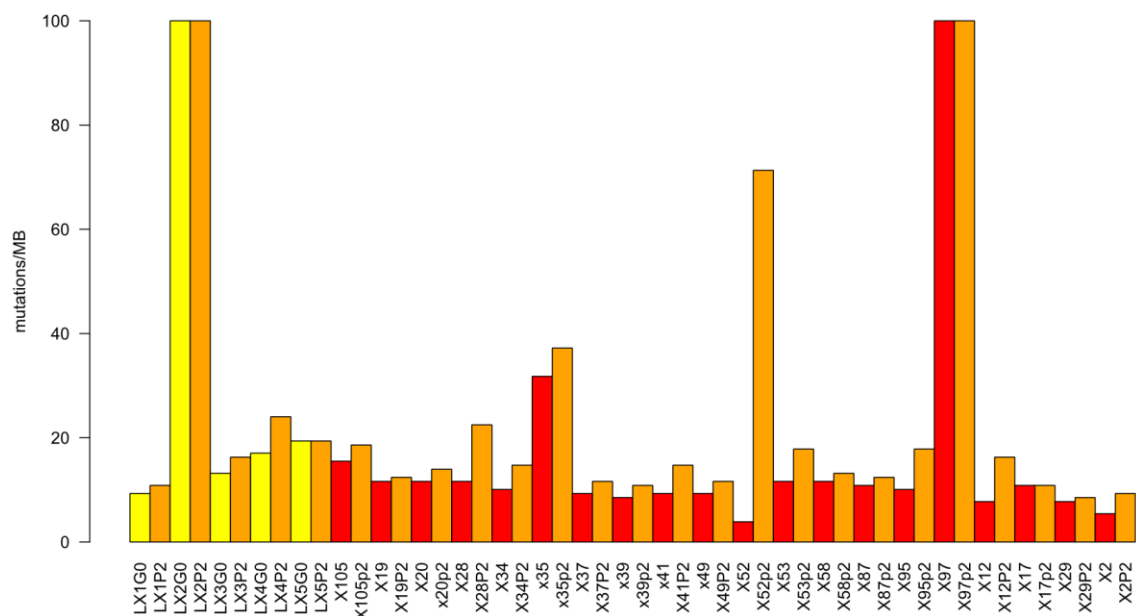

Supplement: f1 [file 2954208.f1.zip]
