# Supplementary material for: Challenges in Stratifying the Molecular Variability of Patient-Derived Colon Tumor Xenografts
Source: Biomed Res Int. 2018 Dec 19;2018:2954208. doi: 10.1155/2018/2954208 (PMC6313970; doi:10.1155/2018/2954208)
Supplement: Supplementary Materials — Figure S1: immunohistochemistry of HLA confirms loss of the human component in PDX tissue stroma (10x objective). Figure S2: fraction of reads supporting deleterious variants in TP53 in primary tissue (red columns) and PDXs (green columns). No deleterious variants were found in cell lines. Fields with values larger than 0.66 are marked red. REF: reference variant; ALT: alternative variant. Figure S3: waterfall plot of the most frequently mutated cancer driver genes. Figure S4: number of single nucleotide variants and short indels identified in each sample. Samples LX2 and X97 had more than 100 and 400 variants/MB, respectively, and do not fit the scale (see the first panel in Figure 3). Supplementary Tables 1-5 are deposited in a separate excel file. [file 2954208.f1.zip]

Archive with 3 entries (2 files):
- 2954208.f1/
- 2954208.f1/mat.2954208.v1.xlsx
- 2954208.f1/Supplementary figures 1-4_BMRI_2603419.pdf
